# Supplementary material for: Association between Socioeconomic Status and One-Month Mortality after Surgery in 20 Primary Solid Tumors: a Pan-Cancer Analysis
Source: PubMed Central journal article supplement (PMC7391197; doi:10.7150/jca.46088), 2020-07-11
Supplement: jcav11p5449s1.pdf [file jcav11p5449s1.pdf]

Figure S1. Flowchart of patient inclusion and exclusion into the study.

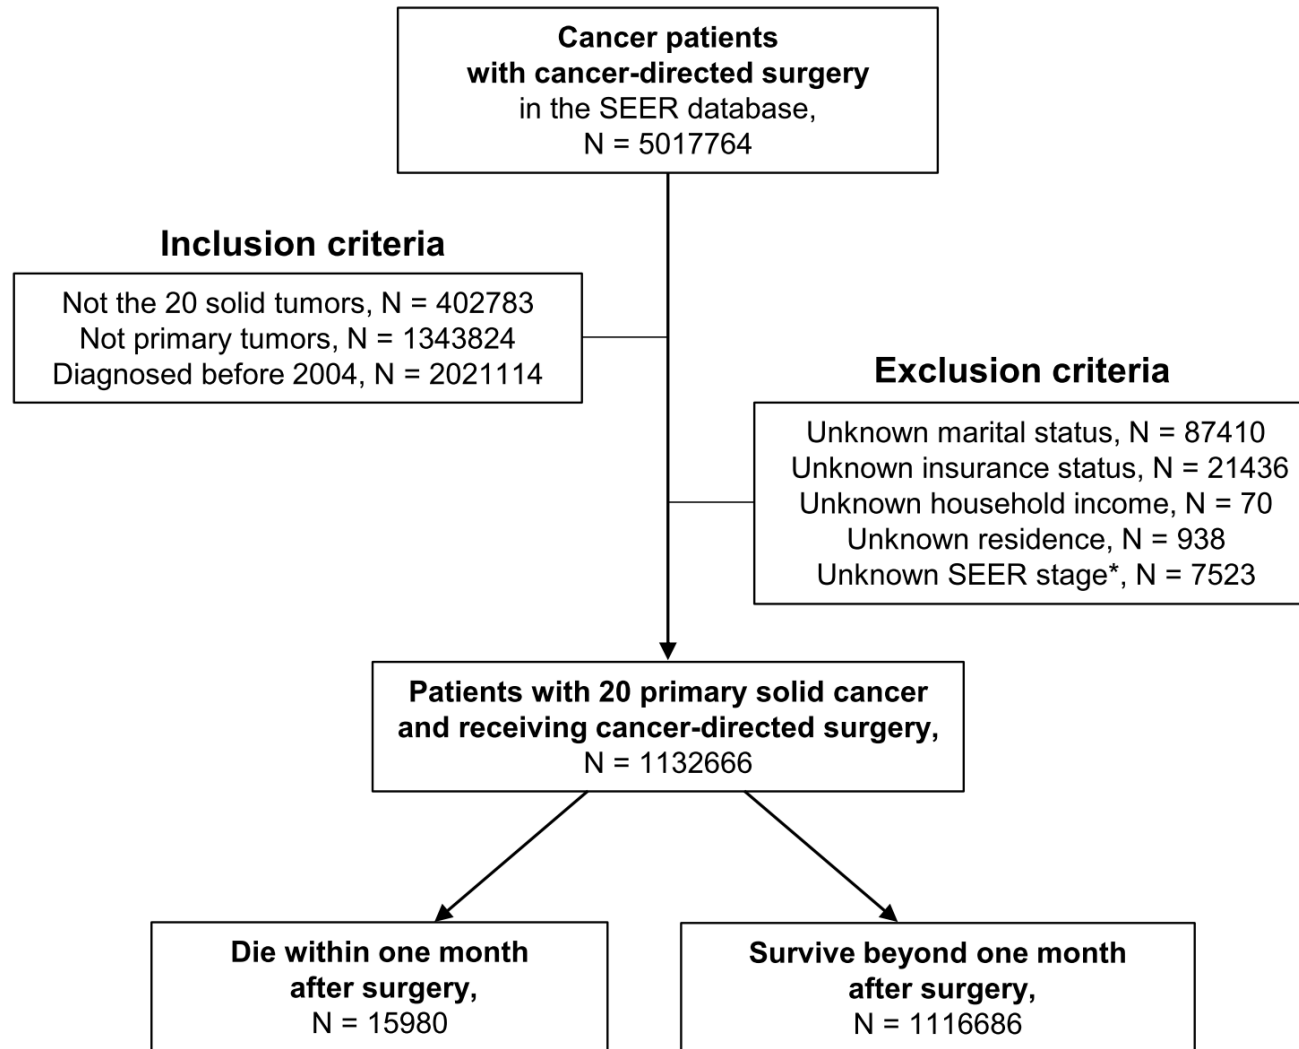

Abbreviations: SEER, Surveillance Epidemiology, and End Results; N, number.

Table S1. Baseline characteristics of included patients by cancer site.

| Characteristic    |                        | Bladder<br>N=71489 | Brain<br>N=25030 | Breast<br>N=301471 | Cervix<br>N=11919 | Colorectum<br>N=161466 | Esophagus<br>N=5154 | Kidney<br>N=59354 | Larynx<br>N=5389 | Liver<br>N=9695 | Lung<br>N=48460 |
|-------------------|------------------------|--------------------|------------------|--------------------|-------------------|------------------------|---------------------|-------------------|------------------|-----------------|-----------------|
| Group             | Die<1 month            | 1945 (2.7)         | 1634 (6.5)       | 432 (0.1)          | 55 (0.5)          | 6211 (3.8)             | 75 (1.5)            | 664 (1.1)         | 61 (1.1)         | 238 (2.5)       | 1353 (2.8)      |
|                   | Survive>1 month        | 69544 (97.3)       | 23396 (93.5)     | 301039 (99.9)      | 11864 (99.5)      | 155255 (96.2)          | 5079 (98.5)         | 58690 (98.9)      | 5328 (98.9)      | 9457 (97.5)     | 47107 (97.2)    |
| Gender            | Male                   | 53348 (74.6)       | 14420 (57.6)     | 2099 (0.7)         | —                 | 82692 (51.2)           | 4359 (84.6)         | 36880 (62.1)      | 4443 (82.4)      | 6969 (71.9)     | 23342 (48.2)    |
|                   | Female                 | 18141 (25.4)       | 10610 (42.4)     | 299372 (99.3)      | —                 | 78774 (48.8)           | 795 (15.4)          | 22474 (37.9)      | 946 (17.6)       | 2726 (28.1)     | 25118 (51.8)    |
| Age               |                        | 69.7±12.6          | 48.9±22.2        | 59.8±13.4          | 45.7±13.2         | 64.8±14.1              | 63.0±10.2           | 59.0±14.8         | 63.2±11.6        | 59.1±15.1       | 66.3±10.8       |
| Race              | NHW                    | 59062 (82.6)       | 18211 (72.8)     | 207882 (69.0)      | 6602 (55.4)       | 109063 (67.5)          | 4367 (84.7)         | 39977 (67.4)      | 3894 (72.3)      | 5051 (52.1)     | 37920 (78.3)    |
|                   | Minority               | 12427 (17.4)       | 6819 (27.2)      | 93589 (31.0)       | 5317 (44.6)       | 52403 (32.5)           | 787 (15.3)          | 19377 (32.6)      | 1495 (27.7)      | 4644 (47.9)     | 10540 (21.7)    |
| Marriage          | Married                | 44998 (62.9)       | 13650 (54.5)     | 178989 (59.4)      | 6057 (50.8)       | 92810 (57.5)           | 3522 (68.3)         | 37770 (63.6)      | 3063 (56.8)      | 5667 (58.5)     | 28671 (59.2)    |
|                   | Unmarried              | 26491 (37.1)       | 11380 (45.5)     | 122482 (40.6)      | 5862 (49.2)       | 68656 (42.5)           | 1632 (31.7)         | 21584 (36.4)      | 2326 (43.2)      | 4028 (41.5)     | 19789 (40.8)    |
| Insurance         | Insured                | 64188 (89.8)       | 20120 (80.4)     | 262923 (87.2)      | 8236 (69.1)       | 137162 (84.9)          | 4603 (89.3)         | 50704 (85.4)      | 4075 (75.6)      | 7579 (78.2)     | 42407 (87.5)    |
|                   | Medicaid/<br>Uninsured | 7301 (10.2)        | 4910 (19.6)      | 38548 (12.8)       | 3683 (30.9)       | 24304 (15.1)           | 551 (10.7)          | 8650 (14.6)       | 1314 (24.4)      | 2116 (21.8)     | 6053 (12.5)     |
|                   |                        |                    |                  |                    |                   |                        |                     |                   |                  |                 |                 |
| Income            | Top 50%                | 34189 (47.8)       | 12164 (48.6)     | 146043 (48.4)      | 5134 (43.1)       | 71343 (44.2)           | 2353 (45.7)         | 26014 (43.8)      | 2101 (39.0)      | 5026 (51.8)     | 22108 (45.6)    |
|                   | Bottom 50%             | 37300 (52.2)       | 12866 (51.4)     | 155428 (51.6)      | 6785 (56.9)       | 90123 (55.8)           | 2801 (54.3)         | 33340 (56.2)      | 3288 (61.0)      | 4669 (48.2)     | 26352 (54.4)    |
| Education         | Top 50%                | 34251 (47.9)       | 12217 (48.8)     | 150946 (50.1)      | 5289 (44.4)       | 73204 (45.3)           | 2327 (45.1)         | 26479 (44.6)      | 2189 (40.6)      | 5129 (52.9)     | 21914 (45.2)    |
|                   | Bottom 50%             | 37238 (52.1)       | 12813 (51.2)     | 150525 (49.9)      | 6630 (55.6)       | 88262 (54.7)           | 2827 (54.9)         | 32875 (55.4)      | 3200 (59.4)      | 4566 (47.1)     | 26546 (54.8)    |
| Residence         | Metropolitan           | 62567 (87.5)       | 22336 (89.2)     | 271252 (90.0)      | 10746 (90.2)      | 141038 (87.3)          | 4416 (85.7)         | 52023 (87.6)      | 4503 (83.6)      | 8958 (92.4)     | 41842 (86.3)    |
|                   | Rural                  | 8922 (12.5)        | 2694 (10.8)      | 30219 (10.0)       | 1173 (9.8)        | 20428 (12.7)           | 738 (14.3)          | 7331 (12.4)       | 886 (16.4)       | 737 (7.6)       | 6618 (13.7)     |
| Unemploy-<br>ment | Top 50%                | 37701 (52.7)       | 12767 (51.0)     | 155728 (51.7)      | 6709 (56.3)       | 86069 (53.3)           | 2557 (49.6)         | 31480 (53.0)      | 2891 (53.6)      | 4925 (50.8)     | 25518 (52.7)    |
|                   | Bottom 50%             | 33788 (47.3)       | 12263 (49.0)     | 145743 (48.3)      | 5210 (43.7)       | 75397 (46.7)           | 2597 (50.4)         | 27874 (47.0)      | 2498 (46.4)      | 4770 (49.2)     | 22942 (47.3)    |
| Poverty           | Top 50%                | 35243 (49.3)       | 12465 (49.8)     | 153345 (50.9)      | 6824 (57.3)       | 87407 (54.1)           | 2414 (46.8)         | 32332 (54.5)      | 3031 (56.2)      | 4710 (48.6)     | 25097 (51.8)    |
|                   | Bottom 50%             | 36246 (50.7)       | 12565 (50.2)     | 148126 (49.1)      | 5095 (42.7)       | 74059 (45.9)           | 2740 (53.2)         | 27022 (45.5)      | 2358 (43.8)      | 4985 (51.4)     | 23363 (48.2)    |
| SEER<br>stage     | Localized              | 54787 (76.6)       | —                | 198979 (66.0)      | 8613 (72.3)       | 72514 (44.9)           | 1788 (34.7)         | 43135 (72.7)      | —                | 7228 (74.6)     | 24201 (49.9)    |
|                   | Regional               | 13866 (19.4)       | —                | 92363 (30.6)       | 2717 (22.8)       | 64086 (39.7)           | 2746 (53.3)         | 11534 (19.4)      | —                | 2039 (21.0)     | 20068 (41.4)    |
|                   | Distant                | 2836 (4.0)         | —                | 10129 (3.4)        | 589 (4.9)         | 24866 (15.4)           | 620 (12.0)          | 4685 (7.9)        | —                | 428 (4.4)       | 4191 (8.6)      |

| Characteristic    |                        | Melanoma<br>N=62920 | Oral cavity<br>N=18419 | Ovary<br>N=27371 | Pancreas<br>N=11570 | Prostate<br>N=136515 | Small intestine<br>N=7394 | Stomach<br>N=16250 | Testis<br>N=15752 | Thyroid<br>N=69694 | Uterine<br>N=67354 |
|-------------------|------------------------|---------------------|------------------------|------------------|---------------------|----------------------|---------------------------|--------------------|-------------------|--------------------|--------------------|
| Group             | Die<1 month            | 191 (0.3)           | 119 (0.6)              | 707 (2.6)        | 395 (3.4)           | 245 (0.2)            | 280 (3.8)                 | 656 (4.0)          | 60 (0.4)          | 159 (0.2)          | 500 (0.7)          |
|                   | Survive>1 month        | 62729 (99.7)        | 18300 (99.4)           | 26664 (97.4)     | 11175 (96.6)        | 136270 (99.8)        | 7114 (96.2)               | 15594 (96.0)       | 15692 (99.6)      | 69535 (99.8)       | 66854 (99.3)       |
| Gender            | Male                   | 34901 (55.5)        | 10942 (59.4)           | —                | 5934 (51.3)         | —                    | 3866 (52.3)               | 9675 (59.5)        | —                 | 15509 (22.3)       | —                  |
|                   | Female                 | 28019 (44.5)        | 7477 (40.6)            | —                | 5636 (48.7)         | —                    | 3528 (47.7)               | 6575 (40.5)        | —                 | 54185 (77.7)       | —                  |
| Age               |                        | 58.0±16.5           | 60.1±15.4              | 58.0±15.0        | 63.6±12.1           | 62.4±8.4             | 61.7±13.3                 | 64.7±13.7          | 34.0±11.8         | 47.9±15.0          | 61.0±11.5          |
| Race              | NHW                    | 58312 (92.7)        | 13636 (74.0)           | 18940 (69.2)     | 8118 (70.2)         | 98077 (71.8)         | 5213 (70.5)               | 7909 (48.7)        | 10594 (67.3)      | 45439 (65.2)       | 46786 (69.5)       |
|                   | Minority               | 4608 (7.3)          | 4783 (26.0)            | 8431 (30.8)      | 3452 (29.8)         | 38438 (28.2)         | 2181 (29.5)               | 8341 (51.3)        | 5158 (32.7)       | 24255 (34.8)       | 20568 (30.5)       |
| Marriage          | Married                | 42463 (67.5)        | 10721 (58.2)           | 15023 (54.9)     | 7496 (64.8)         | 107997 (79.1)        | 4649 (62.9)               | 10293 (63.3)       | 6795 (43.1)       | 45275 (65.0)       | 36875 (54.7)       |
|                   | Unmarried              | 20457 (32.5)        | 7698 (41.8)            | 12348 (45.1)     | 4074 (35.2)         | 28518 (20.9)         | 2745 (37.1)               | 5957 (36.7)        | 8957 (56.9)       | 24419 (35.0)       | 30479 (45.3)       |
| Insurance         | Insured                | 58699 (93.3)        | 15543 (84.4)           | 23035 (84.2)     | 10143 (87.7)        | 128742 (94.3)        | 6394 (86.5)               | 13093 (80.6)       | 12060 (76.6)      | 61361 (88.0)       | 57900 (86.0)       |
|                   | Medicaid/<br>Uninsured | 4221 (6.7)          | 2876 (15.6)            | 4336 (15.8)      | 1427 (12.3)         | 7773 (5.7)           | 1000 (13.5)               | 3157 (19.4)        | 3692 (23.4)       | 8333 (12.0)        | 9454 (14.0)        |
| Income            | Top 50%                | 33354 (53.0)        | 8632 (46.9)            | 13428 (49.1)     | 5697 (49.2)         | 63637 (46.6)         | 3400 (46.0)               | 7468 (46.0)        | 7799 (49.5)       | 35523 (51.0)       | 33119 (49.2)       |
|                   | Bottom 50%             | 29566 (47.0)        | 9787 (53.1)            | 13943 (50.9)     | 5873 (50.8)         | 72878 (53.4)         | 3994 (54.0)               | 8782 (54.0)        | 7953 (50.5)       | 34171 (49.0)       | 34235 (50.8)       |
| Education         | Top 50%                | 33960 (54.0)        | 8684 (47.1)            | 13763 (50.3)     | 5794 (50.1)         | 66241 (48.5)         | 3595 (48.6)               | 7633 (47.0)        | 7874 (50.0)       | 36025 (51.7)       | 33602 (49.9)       |
|                   | Bottom 50%             | 28960 (46.0)        | 9735 (52.9)            | 13608 (49.7)     | 5776 (49.9)         | 70274 (51.5)         | 3799 (51.4)               | 8617 (53.0)        | 7878 (50.0)       | 33669 (48.3)       | 33752 (50.1)       |
| Residence         | Metropolitan           | 55614 (88.4)        | 16175 (87.8)           | 24672 (90.1)     | 10382 (89.7)        | 122221 (89.5)        | 6534 (88.4)               | 14835 (91.3)       | 14384 (91.3)      | 63518 (91.1)       | 60357 (89.6)       |
|                   | Rural                  | 7306 (11.6)         | 2244 (12.2)            | 2699 (9.9)       | 1188 (10.3)         | 14294 (10.5)         | 860 (11.6)                | 1415 (8.7)         | 1368 (8.7)        | 6176 (8.9)         | 6997 (10.4)        |
| Unemploy-<br>ment | Top 50%                | 29269 (46.5)        | 9486 (51.5)            | 14221 (52.0)     | 5822 (50.3)         | 70170 (51.4)         | 3663 (49.5)               | 9127 (56.2)        | 8177 (51.9)       | 35309 (50.7)       | 35186 (52.2)       |
|                   | Bottom 50%             | 33651 (53.5)        | 8933 (48.5)            | 13150 (48.0)     | 5748 (49.7)         | 66345 (48.6)         | 3731 (50.5)               | 7123 (43.8)        | 7575 (48.1)       | 34385 (49.3)       | 32168 (47.8)       |
| Poverty           | Top 50%                | 28365 (45.1)        | 9456 (51.3)            | 13620 (49.8)     | 5686 (49.1)         | 69700 (51.1)         | 3779 (51.1)               | 8867 (54.6)        | 7941 (50.4)       | 33846 (48.6)       | 33078 (49.1)       |
|                   | Bottom 50%             | 34555 (54.9)        | 8963 (48.7)            | 13751 (50.2)     | 5884 (50.9)         | 66815 (48.9)         | 3615 (48.9)               | 7383 (45.4)        | 7811 (49.6)       | 35848 (51.4)       | 34276 (50.9)       |
| SEER<br>stage     | Localized              | 54339 (86.4)        | 8907 (48.4)            | 6983 (25.5)      | 2171 (18.8)         | —                    | 2732 (36.9)               | 6982 (43.0)        | 10974 (69.7)      | 43509 (62.4)       | 48020 (71.3)       |
|                   | Regional               | 7081 (11.3)         | 7634 (41.4)            | 3192 (11.7)      | 7501 (64.8)         | —                    | 2979 (40.3)               | 6864 (42.2)        | 3018 (19.2)       | 24201 (34.7)       | 13557 (20.1)       |
|                   | Distant                | 1500 (2.4)          | 1878 (10.2)            | 17196 (62.8)     | 1898 (16.4)         | —                    | 1683 (22.8)               | 2404 (14.8)        | 1760 (11.2)       | 1984 (2.8)         | 5777 (8.6)         |

Note: All variables were expressed as frequency (percent), except for age as mean ± standard deviation; Some characteristics were not available, such as uncommon classification of SEER stage for cancer sites of brain, larynx and prostate had, and single gender for cancer sites of cervix, ovary, prostate, testis and uterine.

Abbreviations: N, number; NHW, non-Hispanic white; SEER, Surveillance Epidemiology, and End Results.

Table S2. Baseline characteristics of patients after propensity score matching.

| Characteristic     | Die within<br>one month<br>(N=12718) | Survive beyond<br>one month<br>(N=12718) | <i>P</i> | Characteristic         | Die within<br>one month<br>(N=12718) | Survive beyond<br>one month<br>(N=12718) | <i>P</i> |
|--------------------|--------------------------------------|------------------------------------------|----------|------------------------|--------------------------------------|------------------------------------------|----------|
| Tumor site         |                                      |                                          | 1.000    | Age                    |                                      |                                          | 0.915    |
| Bladder            | 1945 (15.3)                          | 1942 (15.3)                              |          |                        | 74.6 ± 12.6                          | 74.6 ± 12.5                              |          |
| Breast             | 432 (3.4)                            | 433 (3.4)                                |          | Race                   |                                      |                                          | 0.013    |
| Colorectum         | 6211 (48.8)                          | 6211 (48.8)                              |          | NHW                    | 9463 (74.4)                          | 9287 (73.0)                              |          |
| Esophagus          | 75 (0.6)                             | 75 (0.6)                                 |          | Minority               | 3255 (25.6)                          | 3431 (27.0)                              |          |
| Kidney             | 664 (5.2)                            | 661 (5.2)                                |          | Marriage               |                                      |                                          | <0.001   |
| Liver              | 238 (1.9)                            | 246 (1.9)                                |          | Married                | 5860 (46.1)                          | 6842 (53.8)                              |          |
| Lung               | 1353 (10.6)                          | 1354 (10.6)                              |          | Unmarried              | 6858 (53.9)                          | 5876 (46.2)                              |          |
| Melanoma           | 191 (1.5)                            | 189 (1.5)                                |          | Insurance              |                                      |                                          | <0.001   |
| Oral cavity        | 119 (0.9)                            | 119 (0.9)                                |          | Insured                | 10492 (82.5)                         | 11179 (87.9)                             |          |
| Pancreas           | 395 (3.1)                            | 398 (3.1)                                |          | Medicaid/<br>Uninsured | 2226 (17.5)                          | 1539 (12.1)                              |          |
| Small<br>Intestine | 280 (2.2)                            | 280 (2.2)                                |          | Income                 |                                      |                                          | <0.001   |
| Stomach            | 656 (5.2)                            | 653 (5.1)                                |          | Top 50%                | 5114 (40.2)                          | 5873 (46.2)                              |          |
| Thyroid            | 159 (1.3)                            | 157 (1.2)                                |          | Bottom 50%             | 7604 (59.8)                          | 6845 (53.8)                              |          |
| Gender             |                                      |                                          | 0.960    | Education              |                                      |                                          | <0.001   |
| Male               | 6894 (54.2)                          | 6899 (54.2)                              |          | Top 50%                | 5307 (41.7)                          | 5958 (46.8)                              |          |
| Female             | 5824 (45.8)                          | 5819 (45.8)                              |          | Bottom 50%             | 7411 (58.3)                          | 6760 (53.2)                              |          |
| Age group          |                                      |                                          | 0.999    | Residence              |                                      |                                          | <0.001   |
| <50                | 459 (3.6)                            | 455 (3.58)                               |          | Metropolitan           | 10971 (86.3)                         | 11186 (88.0)                             |          |
| 50–59              | 1212 (9.5)                           | 1212 (9.53)                              |          | Rural                  | 1747 (13.7)                          | 1532 (12.0)                              |          |
| 60–69              | 2299 (18.1)                          | 2301 (18.09)                             |          | Unemployment           |                                      |                                          | <0.001   |
| >69                | 8748 (68.8)                          | 8750 (68.80)                             |          | Top 50%                | 7099 (55.8)                          | 6803 (53.5)                              |          |
| SEER stage         |                                      |                                          | 0.999    | Bottom 50%             | 5619 (44.2)                          | 5915 (46.5)                              |          |
| Localized          | 3699 (29.1)                          | 3699 (29.1)                              |          | Poverty                |                                      |                                          | <0.001   |
| Regional           | 4757 (37.4)                          | 4754 (37.4)                              |          | Top 50%                | 7281 (57.2)                          | 6626 (52.1)                              |          |
| Distant            | 4262 (33.5)                          | 4265 (33.5)                              |          | Bottom 50%             | 5437 (42.8)                          | 6092 (47.9)                              |          |

Note: Since missing variables were not allowed for matching, we removed cancer sites of brain, cervix, larynx, ovary, prostate, testis and uterine; All variables were expressed as frequency (percent), except for age as mean ± standard deviation.

Abbreviations: N, number; NHW, non-Hispanic white; SEER, Surveillance Epidemiology, and End Results.

Table S3. Multivariate logistic regression analysis after propensity score matching.

| <b>Characteristic</b>            | <b>aOR</b> | <b>95% CI</b> | <b><i>P</i></b> |
|----------------------------------|------------|---------------|-----------------|
| Race (versus NHW)                |            |               |                 |
| Minority                         | 0.842      | 0.794-0.894   | <0.001          |
| Marriage (versus Married)        |            |               |                 |
| Unmarried                        | 1.315      | 1.250-1.382   | <0.001          |
| Insurance (versus Insured)       |            |               |                 |
| Medicaid/Uninsured               | 1.495      | 1.389-1.608   | <0.001          |
| Income (versus Top 50%)          |            |               |                 |
| Bottom 50%                       | 1.150      | 1.050-1.261   | 0.003           |
| Education (versus Top 50%)       |            |               |                 |
| Bottom 50%                       | 1.064      | 0.988-1.146   | 0.102           |
| Residence (versus Metropolitan)  |            |               |                 |
| Rural                            | 1.020      | 0.942-1.105   | 0.620           |
| Unemployment (versus Bottom 50%) |            |               |                 |
| Top 50%                          | 0.978      | 0.923-1.037   | 0.458           |
| Poverty (versus Bottom 50%)      |            |               |                 |
| Top 50%                          | 1.068      | 0.986-1.156   | 0.104           |

Note: The greater the OR value, the greater the possibility of dying within one month after surgery; Since missing variables were not allowed for matching, we removed cancer sites of brain, cervix, larynx, ovary, prostate, testis and uterine.

Abbreviations: NHW, non-Hispanic white; aOR, adjusted odds ratio; CI, confidence interval.

Table S4. Multivariate logistic regression analysis of association between socioeconomic factors and one-month postoperative mortality by cancer sites.

| Characteristic  | Race (versus NHW)   |        | Marriage (versus Married) |        | Insurance (versus Insured) |        | Income (versus Top 50%) |       |
|-----------------|---------------------|--------|---------------------------|--------|----------------------------|--------|-------------------------|-------|
|                 | aOR (95% CI)        | P      | aOR (95% CI)              | P      | aOR (95% CI)               | P      | aOR (95% CI)            | P     |
| Bladder         | 0.858 (0.752-0.979) | 0.023  | 1.519 (1.373-1.681)       | <0.001 | 1.574 (1.363-1.818)        | <0.001 | 1.041 (0.875-1.239)     | 0.647 |
| Brain           | 1.009 (0.887-1.148) | 0.891  | 1.498 (1.345-1.670)       | <0.001 | 1.367 (1.185-1.577)        | <0.001 | 1.127 (0.934-1.359)     | 0.211 |
| Breast          | 1.082 (0.866-1.351) | 0.488  | 1.359 (1.100-1.680)       | 0.004  | 2.037 (1.598-2.596)        | <0.001 | 1.376 (0.966-1.961)     | 0.077 |
| Cervix          | 1.086 (0.599-1.970) | 0.785  | 1.307 (0.720-2.372)       | 0.379  | 1.210 (0.636-2.302)        | 0.561  | 4.157 (1.595-10.839)    | 0.004 |
| Colorectum      | 0.817 (0.766-0.870) | <0.001 | 1.443 (1.363-1.527)       | <0.001 | 1.511 (1.403-1.627)        | <0.001 | 1.173 (1.064-1.294)     | 0.001 |
| Esophagus       | 1.508 (0.827-2.748) | 0.180  | 1.389 (0.844-2.285)       | 0.196  | 1.776 (0.885-3.566)        | 0.106  | 1.889 (0.862-4.139)     | 0.112 |
| Kidney          | 1.127 (0.946-1.343) | 0.179  | 1.534 (1.303-1.806)       | <0.001 | 1.416 (1.140-1.758)        | 0.002  | 1.303 (0.976-1.739)     | 0.073 |
| Larynx          | 0.995 (0.539-1.836) | 0.987  | 3.167 (1.787-5.610)       | <0.001 | 1.783 (0.968-3.281)        | 0.063  | 1.283 (0.504-3.265)     | 0.601 |
| Liver           | 1.171 (0.888-1.545) | 0.263  | 0.955 (0.723-1.260)       | 0.743  | 1.640 (1.210-2.223)        | 0.001  | 1.056 (0.637-1.748)     | 0.833 |
| Lung            | 0.892 (0.773-1.029) | 0.116  | 1.231 (1.096-1.383)       | <0.001 | 1.293 (1.094-1.528)        | 0.003  | 0.883 (0.719-1.085)     | 0.237 |
| Melanoma        | 0.239 (0.103-0.554) | <0.001 | 1.809 (1.329-2.463)       | <0.001 | 2.606 (1.770-3.838)        | <0.001 | 1.197 (0.694-2.066)     | 0.518 |
| Oral cavity     | 0.986 (0.630-1.544) | 0.952  | 1.459 (0.994-2.143)       | 0.054  | 1.947 (1.214-3.123)        | 0.006  | 1.179 (0.586-2.371)     | 0.645 |
| Ovary           | 1.029 (0.858-1.234) | 0.757  | 1.715 (1.461-2.013)       | <0.001 | 1.536 (1.243-1.897)        | <0.001 | 1.007 (0.762-1.332)     | 0.960 |
| Pancreas        | 1.030 (0.814-1.302) | 0.807  | 1.272 (1.024-1.581)       | 0.030  | 1.585 (1.180-2.130)        | 0.002  | 1.208 (0.833-1.751)     | 0.318 |
| Prostate        | 0.956 (0.703-1.301) | 0.776  | 1.661 (1.270-2.172)       | <0.001 | 2.367 (1.644-3.407)        | <0.001 | 1.491 (0.916-2.426)     | 0.108 |
| Small intestine | 1.132 (0.845-1.515) | 0.406  | 1.446 (1.108-1.888)       | 0.007  | 2.029 (1.444-2.851)        | <0.001 | 0.971 (0.618-1.525)     | 0.898 |
| Stomach         | 0.783 (0.660-0.929) | 0.005  | 1.272 (1.068-1.515)       | 0.007  | 1.340 (1.095-1.640)        | 0.005  | 1.200 (0.871-1.653)     | 0.264 |
| Testis          | 1.475 (0.826-2.637) | 0.189  | 2.032 (1.056-3.911)       | 0.034  | 1.908 (1.086-3.349)        | 0.025  | 1.256 (0.437-3.615)     | 0.672 |
| Thyroid         | 1.149 (0.808-1.634) | 0.439  | 1.771 (1.262-2.485)       | <0.001 | 2.007 (1.352-2.978)        | <0.001 | 1.142 (0.618-2.108)     | 0.672 |
| Uterine         | 1.082 (0.887-1.320) | 0.436  | 1.555 (1.286-1.880)       | <0.001 | 1.073 (0.837-1.376)        | 0.577  | 1.023 (0.737-1.419)     | 0.893 |

| Characteristic  | Education           |       | Residence             |       | Unemployment        |       | Poverty             |        |
|-----------------|---------------------|-------|-----------------------|-------|---------------------|-------|---------------------|--------|
|                 | (versus Top 50%)    |       | (versus Metropolitan) |       | (versus Bottom 50%) |       | (versus Bottom 50%) |        |
|                 | aOR (95% CI)        | P     | aOR (95% CI)          | P     | aOR (95% CI)        | P     | aOR (95% CI)        | P      |
| Bladder         | 1.136 (0.985-1.310) | 0.080 | 1.048 (0.901-1.220)   | 0.541 | 1.042 (0.932-1.165) | 0.471 | 0.942 (0.812-1.093) | 0.430  |
| Brain           | 1.253 (1.073-1.464) | 0.004 | 1.026 (0.871-1.209)   | 0.761 | 0.973 (0.861-1.101) | 0.667 | 1.061 (0.903-1.246) | 0.470  |
| Breast          | 1.128 (0.848-1.500) | 0.408 | 0.911 (0.672-1.236)   | 0.549 | 0.744 (0.593-0.932) | 0.010 | 0.984 (0.723-1.340) | 0.920  |
| Cervical        | 0.328 (0.154-0.696) | 0.004 | 0.353 (0.081-1.539)   | 0.166 | 1.041 (0.522-2.076) | 0.909 | 0.561 (0.221-1.428) | 0.226  |
| Colorectal      | 1.030 (0.951-1.115) | 0.472 | 1.026 (0.945-1.114)   | 0.541 | 0.973 (0.914-1.036) | 0.398 | 1.073 (0.987-1.168) | 0.099  |
| Esophagus       | 1.095 (0.559-2.142) | 0.792 | 0.728 (0.351-1.507)   | 0.392 | 0.833 (0.482-1.438) | 0.511 | 0.919 (0.471-1.792) | 0.804  |
| Kidney          | 0.966 (0.764-1.221) | 0.770 | 0.846 (0.656-1.092)   | 0.200 | 0.942 (0.781-1.136) | 0.531 | 1.043 (0.809-1.344) | 0.748  |
| Laryngeal       | 1.535 (0.695-3.389) | 0.289 | 1.735 (0.893-3.370)   | 0.104 | 0.797 (0.445-1.426) | 0.444 | 0.645 (0.298-1.397) | 0.266  |
| Liver           | 1.052 (0.702-1.578) | 0.805 | 1.315 (0.825-2.098)   | 0.249 | 0.726 (0.527-0.999) | 0.049 | 1.516 (0.969-2.370) | 0.068  |
| Lung            | 1.055 (0.893-1.245) | 0.530 | 1.092 (0.924-1.292)   | 0.301 | 1.017 (0.894-1.156) | 0.796 | 1.361 (1.137-1.629) | <0.001 |
| Melanoma        | 1.525 (0.958-2.426) | 0.075 | 0.916 (0.591-1.418)   | 0.693 | 0.875 (0.621-1.234) | 0.447 | 1.109 (0.706-1.742) | 0.654  |
| Oral cavity     | 1.548 (0.869-2.757) | 0.138 | 0.912 (0.525-1.583)   | 0.743 | 1.280 (0.824-1.990) | 0.273 | 0.900 (0.499-1.623) | 0.725  |
| Ovarian         | 1.293 (1.032-1.619) | 0.026 | 0.907 (0.697-1.180)   | 0.466 | 1.041 (0.865-1.253) | 0.673 | 1.085 (0.848-1.390) | 0.516  |
| Pancreat        | 0.772 (0.573-1.040) | 0.089 | 1.184 (0.848-1.654)   | 0.321 | 1.124 (0.881-1.435) | 0.347 | 1.400 (1.004-1.952) | 0.047  |
| Prostate        | 0.865 (0.577-1.298) | 0.485 | 1.316 (0.903-1.917)   | 0.153 | 1.170 (0.853-1.604) | 0.330 | 0.905 (0.601-1.363) | 0.632  |
| Small Intestine | 1.075 (0.746-1.549) | 0.699 | 1.531 (1.067-2.197)   | 0.021 | 1.218 (0.910-1.630) | 0.184 | 1.207 (0.812-1.793) | 0.353  |
| Stomach         | 0.947 (0.737-1.217) | 0.671 | 0.897 (0.663-1.213)   | 0.481 | 1.024 (0.836-1.254) | 0.817 | 1.196 (0.902-1.584) | 0.213  |
| Testicular      | 1.377 (0.573-3.309) | 0.475 | 0.881 (0.348-2.233)   | 0.790 | 1.125 (0.569-2.225) | 0.735 | 0.799 (0.325-1.963) | 0.624  |
| Thyroid         | 1.476 (0.891-2.444) | 0.131 | 1.009 (0.583-1.745)   | 0.975 | 0.949 (0.636-1.417) | 0.799 | 0.939 (0.547-1.610) | 0.818  |
| Uterine         | 1.279 (0.979-1.671) | 0.071 | 1.108 (0.821-1.494)   | 0.503 | 0.811 (0.651-1.010) | 0.061 | 1.246 (0.929-1.671) | 0.142  |

Note: The greater the OR value, the greater the possibility of dying within one month after surgery; The ORs were adjusted by age (per one year), gender (male or female), SEER stage (localized, regional or distant), except for brain and larynx by age and gender, for prostate by age, for cervix, ovary, testis and uterine by age and SEER stage.

Abbreviations: NHW, non-Hispanic white; aOR, adjusted odds ratio; CI, confidence interval.

Table S5. Multivariate logistic regression analysis of association between socioeconomic factors and one-month postoperative mortality by genders.

| Characteristic                   | Male                |          | Female              |          |
|----------------------------------|---------------------|----------|---------------------|----------|
|                                  | aOR (95% CI)        | <i>P</i> | aOR (95% CI)        | <i>P</i> |
| Race (versus NHW)                |                     | 0.208    |                     | 0.001    |
| Minority                         | 1.039 (0.979-1.102) |          | 0.909 (0.858-0.964) |          |
| Marriage (versus Married)        |                     | <0.001   |                     | <0.001   |
| Unmarried                        | 1.551 (1.474-1.631) |          | 1.453 (1.377-1.533) |          |
| Insurance (versus Insured)       |                     | <0.001   |                     | <0.001   |
| Medicaid/Uninsured               | 1.522 (1.417-1.634) |          | 1.698 (1.590-1.812) |          |
| Income (versus Top 50%)          |                     | 0.007    |                     | 0.016    |
| Bottom 50%                       | 1.133 (1.034-1.242) |          | 1.115 (1.020-1.219) |          |
| Education (versus Top 50%)       |                     | 0.159    |                     | 0.003    |
| Bottom 50%                       | 1.055 (0.979-1.137) |          | 1.117 (1.039-1.201) |          |
| Residence (versus Metropolitan)  |                     | 0.194    |                     | 0.838    |
| Rural                            | 1.052 (0.975-1.135) |          | 1.008 (0.932-1.091) |          |
| Unemployment (versus Bottom 50%) |                     | 0.690    |                     | 0.054    |
| Top 50%                          | 1.012 (0.954-1.073) |          | 0.945 (0.892-1.001) |          |
| Poverty (versus Bottom 50%)      |                     | 0.012    |                     | 0.110    |
| Top 50%                          | 1.106 (1.022-1.196) |          | 1.066 (0.986-1.152) |          |

Note: The ORs were adjusted by age (per one year) and SEER stage (localized, regional or distant); The greater the OR value, the greater the possibility of dying within one month after surgery; Due to missing data or uncommon classification of SEER stage, cancer sites of brain, larynx and prostate weren't included in the multivariable logistic analysis.

Abbreviations: NHW, non-Hispanic white; aOR, adjusted odds ratio; CI, confidence interval.



Table S6. Multivariate logistic regression analysis of association between socioeconomic factors and one-month postoperative mortality by age groups.

| Characteristic                   | <50                 |          | 50–59               |          | 60–69               |          | >69                 |          |
|----------------------------------|---------------------|----------|---------------------|----------|---------------------|----------|---------------------|----------|
|                                  | aOR (95% CI)        | <i>P</i> | aOR (95% CI)        | <i>P</i> | aOR (95% CI)        | <i>P</i> | aOR (95% CI)        | <i>P</i> |
| Race (versus NHW)                |                     | 0.511    |                     | 0.995    |                     | 0.143    |                     | <0.001   |
| Minority                         | 1.058 (0.893-1.254) |          | 1.000 (0.891-1.121) |          | 1.068 (0.978-1.167) |          | 0.841 (0.797-0.887) |          |
| Marriage (versus Married)        |                     | <0.001   |                     | <0.001   |                     | <0.001   |                     | <0.001   |
| Unmarried                        | 1.499 (1.265-1.775) |          | 1.593 (1.426-1.779) |          | 1.541 (1.421-1.671) |          | 1.713 (1.638-1.791) |          |
| Insurance (versus Insured)       |                     | <0.001   |                     | <0.001   |                     | <0.001   |                     | <0.001   |
| Medicaid/Uninsured               | 1.740 (1.461-2.073) |          | 1.882 (1.672-2.118) |          | 1.519 (1.374-1.679) |          | 1.345 (1.258-1.439) |          |
| Income (versus Top 50%)          |                     | 0.445    |                     | 0.436    |                     | 0.755    |                     | <0.001   |
| Bottom 50%                       | 1.123 (0.833-1.515) |          | 1.082 (0.888-1.318) |          | 1.024 (0.884-1.186) |          | 1.146 (1.060-1.238) |          |
| Education (versus Top 50%)       |                     | 0.621    |                     | 0.061    |                     | 0.012    |                     | 0.277    |
| Bottom 50%                       | 1.063 (0.834-1.354) |          | 1.162 (0.993-1.360) |          | 1.162 (1.034-1.307) |          | 1.036 (0.972-1.104) |          |
| Residence (versus Metropolitan)  |                     | 0.124    |                     | 0.182    |                     | 0.816    |                     | 0.807    |
| Rural                            | 1.229 (0.945-1.599) |          | 1.117 (0.949-1.315) |          | 1.014 (0.899-1.144) |          | 0.992 (0.927-1.061) |          |
| Unemployment (versus Bottom 50%) |                     | 0.866    |                     | 0.189    |                     | 0.173    |                     | 0.450    |
| Top 50%                          | 0.983 (0.806-1.199) |          | 0.919 (0.811-1.042) |          | 0.937 (0.854-1.029) |          | 1.020 (0.970-1.072) |          |
| Poverty (versus Bottom 50%)      |                     | 0.727    |                     | 0.364    |                     | <0.001   |                     | 0.603    |
| Top 50%                          | 1.048 (0.804-1.367) |          | 1.084 (0.911-1.289) |          | 1.302 (1.144-1.481) |          | 1.018 (0.952-1.088) |          |

Note: The ORs were adjusted by gender (male or female) and SEER stage (localized, regional or distant); The greater the OR value, the greater the possibility of dying within one month after surgery; Due to missing data or uncommon classification of SEER stage, cancer sites of brain, larynx and prostate weren't included in the multivariable logistic analysis.

Abbreviations: NHW, non-Hispanic white; aOR, adjusted odds ratio; CI, confidence interval.

Table S7. Multivariate logistic regression analysis of association between socioeconomic factors and one-month postoperative mortality by SEER stage.

| Characteristic                   | Localized           |        | Regional            |        | Distant             |        |
|----------------------------------|---------------------|--------|---------------------|--------|---------------------|--------|
|                                  | aOR (95% CI)        | P      | aOR (95% CI)        | P      | aOR (95% CI)        | P      |
| Race (versus NHW)                |                     | 0.153  |                     | 0.139  |                     | 0.015  |
| Minority                         | 1.060 (0.979-1.148) |        | 0.949 (0.885-1.017) |        | 0.921 (0.861-0.984) |        |
| Marriage (versus Married)        |                     | <0.001 |                     | <0.001 |                     | <0.001 |
| Unmarried                        | 1.579 (1.474-1.691) |        | 1.422 (1.337-1.512) |        | 1.520 (1.431-1.613) |        |
| Insurance (versus Insured)       |                     | <0.001 |                     | <0.001 |                     | <0.001 |
| Medicaid/Uninsured               | 1.879 (1.711-2.063) |        | 1.578 (1.455-1.712) |        | 1.408 (1.305-1.520) |        |
| Income (versus Top 50%)          |                     | <0.001 |                     | <0.001 |                     | <0.001 |
| Bottom 50%                       | 1.166 (1.035-1.314) |        | 1.114 (1.001-1.239) |        | 1.089 (0.979-1.211) |        |
| Education (versus Top 50%)       |                     | 0.006  |                     | 0.260  |                     | 0.064  |
| Bottom 50%                       | 1.147 (1.040-1.265) |        | 1.051 (0.964-1.147) |        | 1.084 (0.995-1.181) |        |
| Residence (versus Metropolitan)  |                     | 0.663  |                     | 0.053  |                     | 0.739  |
| Rural                            | 1.023 (0.923-1.133) |        | 1.093 (0.999-1.196) |        | 0.984 (0.898-1.079) |        |
| Unemployment (versus Bottom 50%) |                     | 0.247  |                     | 0.507  |                     | 0.759  |
| Top 50%                          | 0.956 (0.885-1.032) |        | 0.977 (0.912-1.047) |        | 0.989 (0.924-1.060) |        |
| Poverty (versus Bottom 50%)      |                     | 0.168  |                     | 0.029  |                     | 0.118  |
| Top 50%                          | 1.075 (0.970-1.191) |        | 1.108 (1.010-1.214) |        | 1.077 (0.981-1.182) |        |

Note: The ORs were adjusted by age (per one year) and gender (male or female); The greater the OR value, the greater the possibility of dying within one month after surgery; Due to missing data or uncommon classification of SEER stage, cancer sites of brain, larynx and prostate weren't included in the multivariable logistic analysis.

Abbreviations: NHW, non-Hispanic white; aOR, adjusted odds ratio; CI, confidence interval.
